# Supplementary material
Source: PubMed Central journal article supplement (PMC6049617)
Supplement: NIHMS78381-supplement-Supplement.pdf [file NIHMS78381-supplement-Supplement.pdf]

**Supplemental tables**

**Supplemental table 1. Results from GLMs and conversions for Richardson and colleagues single binary exposure example using Evans County Data**

|                                                              | OR                   | Risks                                            | RD                     | RR                  |
|--------------------------------------------------------------|----------------------|--------------------------------------------------|------------------------|---------------------|
| Paper                                                        | 3.11 (1.48 to 6.52)  | 27.3%<br>10.8%                                   | 0.165 (0.030 to 0.300) | 2.54 (1.44 to 4.46) |
| Odds ratio (OR) from a logistic regression.                  | 3.11 (1.48 to 6.53)  | 0.273 (0.142 to 0.404)<br>0.108 (0.075 to 0.140) | 0.165 (0.030 to 0.300) | 2.54 (1.44 to 4.46) |
| Risk from a linear binomial GLM with no constant / intercept | 3.11 (1.48 to 6.53)  | 0.273 (0.142 to 0.404)<br>0.108 (0.075 to 0.140) | 0.165 (0.030 to 0.300) | 2.54 (1.44 to 4.46) |
| Risk difference (RD) from a linear binomial GLM              | 3.11 ( 1.48 to 6.53) | 0.273 (0.142 to 0.404)<br>0.108 (0.075 to 0.140) | 0.165 (0.030 to 0.300) | 2.54 (1.44 to 4.46) |
| Relative risk (RR) from a log binomial GLM                   | 3.11 (1.48 to 6.53)  | 0.273 (0.142 to 0.404)<br>0.108 (0.075 to 0.140) | 0.165 (0.030 to 0.300) | 2.54 (1.44 to 4.46) |

**Supplemental table 2. Results from GLMs and conversions for Richardson and colleagues two binary exposures' example using Evans County Data**

|                                                              | OR                                                                  | Risk                                                                                                 | RD                                                                 | RR                                                                  |
|--------------------------------------------------------------|---------------------------------------------------------------------|------------------------------------------------------------------------------------------------------|--------------------------------------------------------------------|---------------------------------------------------------------------|
| Paper                                                        | -                                                                   | 5.0%<br>14.7%<br>22.1%<br>31.6%                                                                      | 0.10 (0.04 to 0.16)<br>0.17 (-0.04 to 0.38)<br>0.27 (0.10 to 0.44) | 2.95 (1.42 to 6.15)<br>4.44 (1.43 to 13.75)<br>6.33 (2.76 to 14.53) |
| Odds ratio (OR) from a logistic regression.                  | 3.29 (1.49 to 7.28)<br>5.41 (1.37 to 21.40)<br>8.79 (3.15 to 24.51) | 0.050 (0.018 to 0.082)<br>0.147 (0.095 to 0.199)<br>0.221 (0.015 to 0.427)<br>0.316 (0.149 to 0.482) | 0.10 (0.04 to 0.16)<br>0.17 (-0.04 to 0.38)<br>0.27 (0.10 to 0.44) | 2.95 (1.42 to 6.16)<br>4.44 (1.43 to 13.76)<br>6.33 (2.76 to 14.54) |
| Risk from a linear binomial GLM with no constant / intercept | 3.29 (1.49 to 7.28)<br>5.41 (1.37 to 21.40)<br>8.79 (3.15 to 24.51) | 0.050 (0.018 to 0.082)<br>0.147 (0.095 to 0.199)<br>0.221 (0.015 to 0.427)<br>0.316 (0.149 to 0.482) | 0.10 (0.04 to 0.16)<br>0.17 (-0.04 to 0.38)<br>0.27 (0.10 to 0.44) | 2.95 (1.42 to 6.16)<br>4.44 (1.43 to 13.76)<br>6.33 (2.76 to 14.54) |
| Risk difference (RD) from a linear binomial GLM              | 3.29 (1.49 to 7.28)<br>5.41 (1.37 to 21.40)<br>8.79 (3.15 to 24.51) | 0.050 (0.018 to 0.082)<br>0.147 (0.095 to 0.199)<br>0.221 (0.015 to 0.427)<br>0.316 (0.149 to 0.482) | 0.10 (0.04 to 0.16)<br>0.17 (-0.04 to 0.38)<br>0.27 (0.10 to 0.44) | 2.95 (1.42 to 6.16)<br>4.44 (1.43 to 13.76)<br>6.33 (2.76 to 14.54) |
| Relative risk (RR) from a log binomial GLM                   | 3.29 (1.49 to 7.28)<br>5.41 (1.37 to 21.40)<br>8.79 (3.15 to 24.51) | 0.050 (0.018 to 0.082)<br>0.147 (0.095 to 0.199)<br>0.221 (0.015 to 0.427)<br>0.316 (0.149 to 0.482) | 0.10 (0.04 to 0.16)<br>0.17 (-0.04 to 0.38)<br>0.27 (0.10 to 0.44) | 2.95 (1.42 to 6.16)<br>4.44 (1.43 to 13.76)<br>6.33 (2.76 to 14.54) |
